# Supplementary material for: Degradable polymeric nanoparticles by aggregation of thermoresponsive polymers and “click” chemistry
Source: Royal Society of Chemistry journal article supplement (doi:10.1039/c5nr04448k), 2015-01-01
Supplement: c5nr04448k1.pdf [file c5nr04448k1.pdf]

## Electronic Supplementary Information

### Degradable polymeric nanoparticles by aggregation of thermoresponsive polymers and “click” chemistry

Andrzej Dworak,\* Daria Lipowska, Dawid Szweda, Jerzy Suwinski, Barbara Trzebicka, Roza Szweda

Centre of Polymer and Carbon Materials, Polish Academy of Sciences, M. Curie-Skłodowskiej 34, 41-819 Zabrze, Poland

\* [adworak@cmpw-pan.edu.pl](mailto:adworak@cmpw-pan.edu.pl)

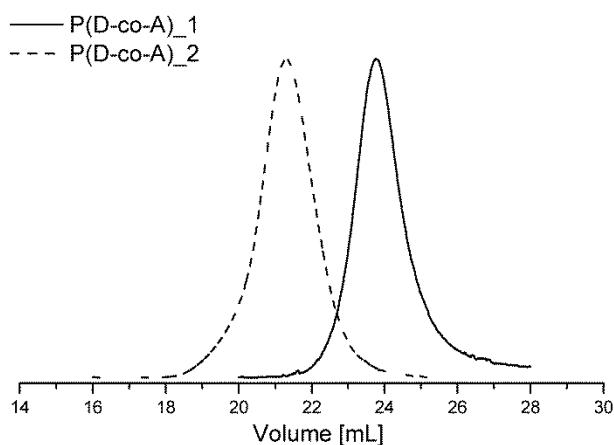

Fig. S1 GPC-MALLS chromatograms for P(D-co-A)\_1 and P(D-co-A)\_2 copolymers.

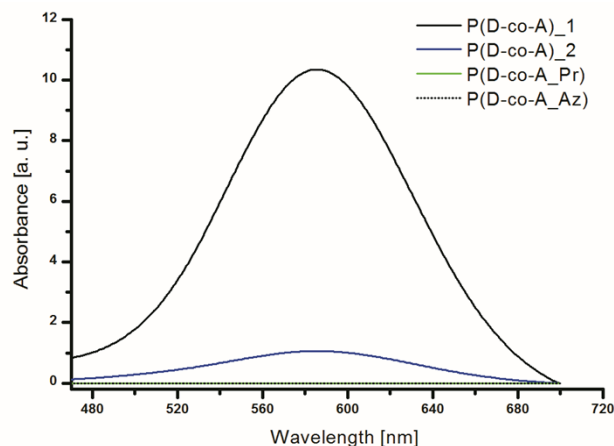

Fig. S2 The absorbance spectra of P(D-co-A)\_1, P(D-co-A)\_2, P(D-co-A)\_Pr and P(D-co-A)\_Az (10 g/L) after reaction with ninhydrine.
